# Supplementary material for: Formation of FexOy hollow nanospheres inside cage type mesoporous materials: a nanocasting pathway
Source: Royal Society of Chemistry journal article supplement (doi:10.1039/c2ra21493h), 2012-01-01
Supplement: c2ra21493h.pdf [file c2ra21493h.pdf]

## Electronic supplementary Information

### Formation of Fe<sub>x</sub>O<sub>y</sub> hollow nanospheres inside cage type highly ordered mesoporous material: a nanocasting pathway

Hongxiao Jin,<sup>a</sup> Chiya Wang,<sup>a</sup> Bo Hong,\*<sup>a</sup> Langsheng Ling,<sup>b</sup> Xiaojian Gu, Dingfeng Jin,<sup>a</sup> Xiaoling Peng,<sup>a</sup> Xinqing Wang<sup>a</sup> and Hongliang Ge<sup>a</sup>

<sup>a</sup> Zhejiang Province Key Laboratory of Magnetism, College of Materials Science and Engineering, China Jiliang University, Hangzhou 310018, People's Republic of China. Fax: +86-571-8687-5600; Tel: +86-571-8687-5600; E-mail:

Bohong@cjl.u.edu.cn or hongbo@mail.ustc.edu.cn.

<sup>b</sup> High Magnetic Field Laboratory, Chinese Academy of Sciences, Hefei 230031, People's Republic of China.

#### 1. Experimental Section

**1.1 Materials.** Tetraethyl orthosilicate (TEOS) (99%), 1,3,5-trimethylbenzene (TMB), potassium chloride (KCl), hydrochloric acid (HCl), sulfuric acid (H<sub>2</sub>SO<sub>4</sub>), and Iron (III) nitrate [Fe(NO<sub>3</sub>)<sub>3</sub>·9H<sub>2</sub>O] were purchased from Shanghai Chemical Reagent Factory of China without further treatment. Triblock copolymer poly (ethylene oxide)-b-poly (propylene oxide)-b-poly(ethylene oxide) Pluronic F127 (EO<sub>106</sub>PO<sub>70</sub>EO<sub>106</sub>, MW = 12600) was purchased from Aldrich. Distilled water was used in all experiments.

**1.2 Synthesis of LP-FDU-12 Silica.** The synthesis of mesoporous silica LP-FDU-12 has been reported previously by Fan and co-workers (*J. Am. Chem. Soc.* 2005, **127**, 10794). The synthesis was as follows: 4.0 g of F127, 4.8 g of TMB, and 20 g of KCl were dissolved in 240 mL of H<sub>2</sub>O and 50 mL of HCl at 15 °C. After 6 h of stirring, 20 mL of TEOS was added to this solution. After further stirring for 20 h, the mixture was transferred into an autoclave and heated at 100 °C for 24 h. As-made products were obtained by filtration and dried at room temperature in air. To achieve less shrinkage pore structure, the sample was refluxed in 4 M H<sub>2</sub>SO<sub>4</sub> for 20 h to remove the template (*Chem. Mater.* 2004, **16**, 2918).

**1.3 Preparation of the hollow nanospheres.** In a typical synthesis of  $\text{Fe}_x\text{O}_y$  hollow nanospheres, 6.73 g of  $\text{Fe}(\text{NO}_3)_3 \cdot 9\text{H}_2\text{O}$  was dissolved in 30 mL of ethanol followed by the addition of 2 g of mesoporous silica template. The mixture was stirred at room temperature until a nearly dry powder had been obtained; the sample was then heated slowly to 200 °C and calcined at the same temperature for 3 h to pyrolyze the nitrate, followed by calcination at 450 °C for 6 h with a ramp 1 °C  $\text{min}^{-1}$  for metal oxide to crystallize. The resulting sample was twice treated with a hot 2 M NaOH solution to remove the silica template, followed by washing with water and ethanol several times, and then drying at 60 °C. This procedure leads to  $\text{Fe}_x\text{O}_y$  hollow nanospheres with a poor-crystalline structure. Reduction for  $\text{Fe}_3\text{O}_4$  hollow nanospheres was achieved by heating at 350 °C for 1 h under a 50 mL/min  $\text{H}_2/\text{Ar}$  (5:95) atmosphere. For the preparation of  $\gamma\text{-Fe}_2\text{O}_3$  hollow nanospheres, the as-prepared  $\text{Fe}_3\text{O}_4$  hollow nanospheres were heated at 250 °C for 2 h in air. Both the oxidation and reduction reaction were monitored by TG showing almost stoichiometric ratio of the reactants were transform to products in the reactions.

**1.4 Characterization.** The Iron oxides hollow nanospheres phase were monitored by low-angle X-ray diffraction (XRD) and recorded on a Siemens D8 Advance diffractometer with Ni-filtered  $\text{Cu K}\alpha$  radiation. Transmission electron microscopy (TEM) experiments were conducted on a JEOL-JEM-2010 microscope operated at 200 kV. Nitrogen physisorption experiments were measured at 77 K on a nitrogen adsorption apparatus (ASAP 2020) after degassing samples at 180 °C for 5 h. The Brunauer–Emmett–Teller (BET) surface area ( $S_{\text{BET}}$ ) was estimated using adsorption data in a relative pressure range from 0.04 to 0.2. The mesopore size distributions (PSD) were calculated by analyzing the adsorption data of the  $\text{N}_2$  isotherm using the Barrett–Joyner–Halenda (BJH) method. TG and DTA analyses were carried out using SDT-Q600 (TA instruments). The magnetic properties were measured by using a Superconducting Quantum Interference Device (SQUID) MPMS system under a 0.005 T magnetic field. The samples were first cooled down to 4 K without any external magnetic field. Then, the M–T measurements were performed with warming to 300 K at a 0.005 T field. The FC curve was obtained after the temperature was reduced to 4 K at 0.005 T field and then measured with heating up to 300 K at the same magnetic field. The M–H hysteresis loops were measured with a field sweep from 6 to –6 T at different temperatures.

## 2. Table and Figures

**Table S1.** Structural properties of the template and iron oxides hollow nanospheres.

| Sample                         | $S_{\text{BET}}$<br>( $\text{m}^2 \text{g}^{-1}$ ) | $V_{\text{T}}$<br>( $\text{cm}^3 \text{g}^{-1}$ ) | $d_0$<br>(nm) | $D_{\text{w}}$<br>(nm) |
|--------------------------------|----------------------------------------------------|---------------------------------------------------|---------------|------------------------|
| LP-FDU-12                      | 1007.5                                             | 0.790                                             | 14.8          | 19.8                   |
| $\text{Fe}_x\text{O}_y$        | 107.9                                              | 0.248                                             | 13.5          | 16.3                   |
| $\text{Fe}_3\text{O}_4$        | 91.5                                               | 0.248                                             | 14.7          | 16.1                   |
| $\gamma\text{-Fe}_2\text{O}_3$ | 88.0                                               | 0.222                                             | 13.4          | 15.8                   |

$S_{\text{BET}}$  is the specific surface area deduced from the isotherm analysis in the relative pressure range of 0.05-0.2;  $V_{\text{T}}$  is the total pore volume at relative pressures 0.95;  $d_0$  is the pore diameter calculated from the adsorption branch of the isotherm using the BJH method;  $D_{\text{w}}$  is the average sphere diameter measured from TEM.

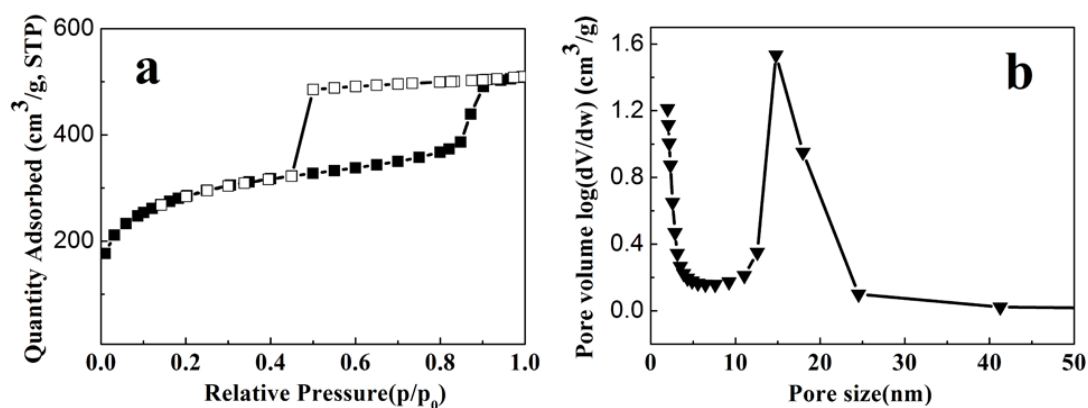

**Figure S1** Nitrogen physisorption and pore size distributions for the LP-FDU-12

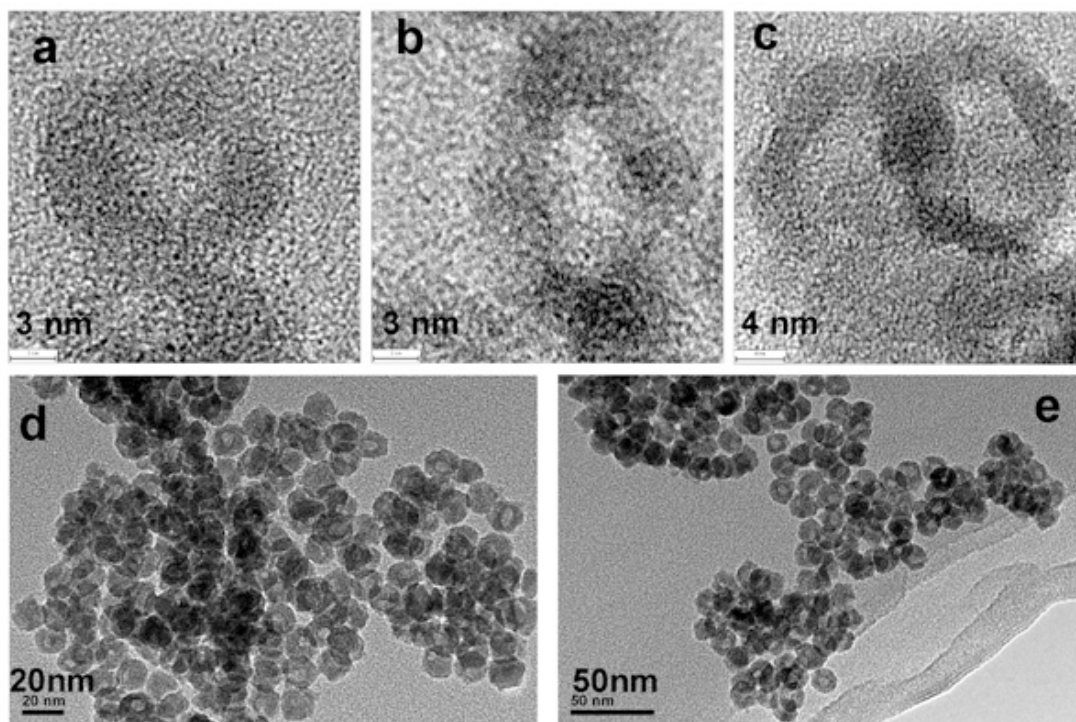

**Figure S2** TEM images of  $\text{Fe}_x\text{O}_y$  hollow nanospheres: (a-c) HRTEM images, (d, e) TEM images.

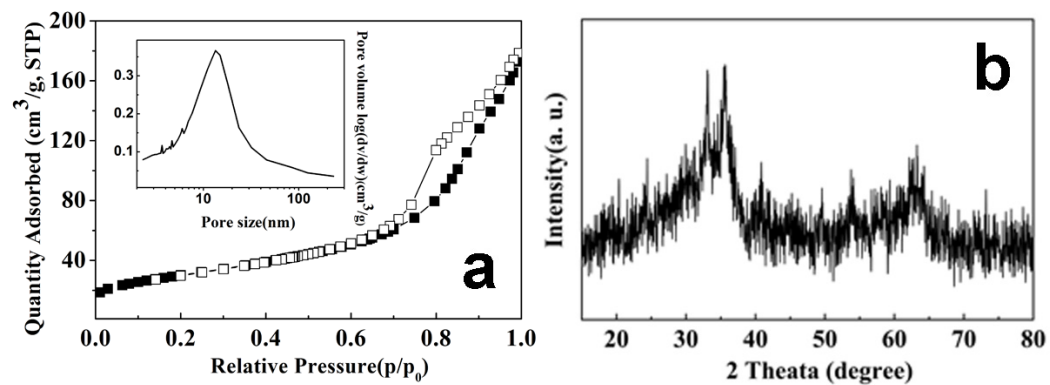

**Figure S3** Nitrogen physisorption and pore size distributions (Left) and Wide-angle powder XRD pattern (Right) for the  $\text{Fe}_x\text{O}_y$  hollow nanospheres.

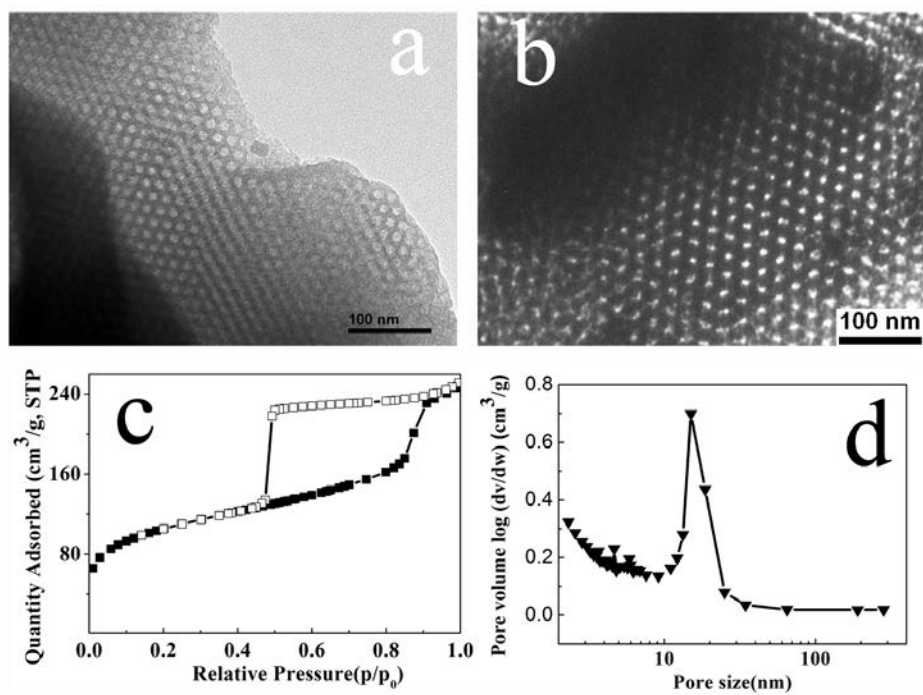

**Figure S4** TEM images of (a) LP-FDU-12 and (b) hybrid of LP- FDU-12 and  $\text{Fe}_x\text{O}_y$ , and (c) nitrogen physisorption and (d) pore size distributions for the hybrid.

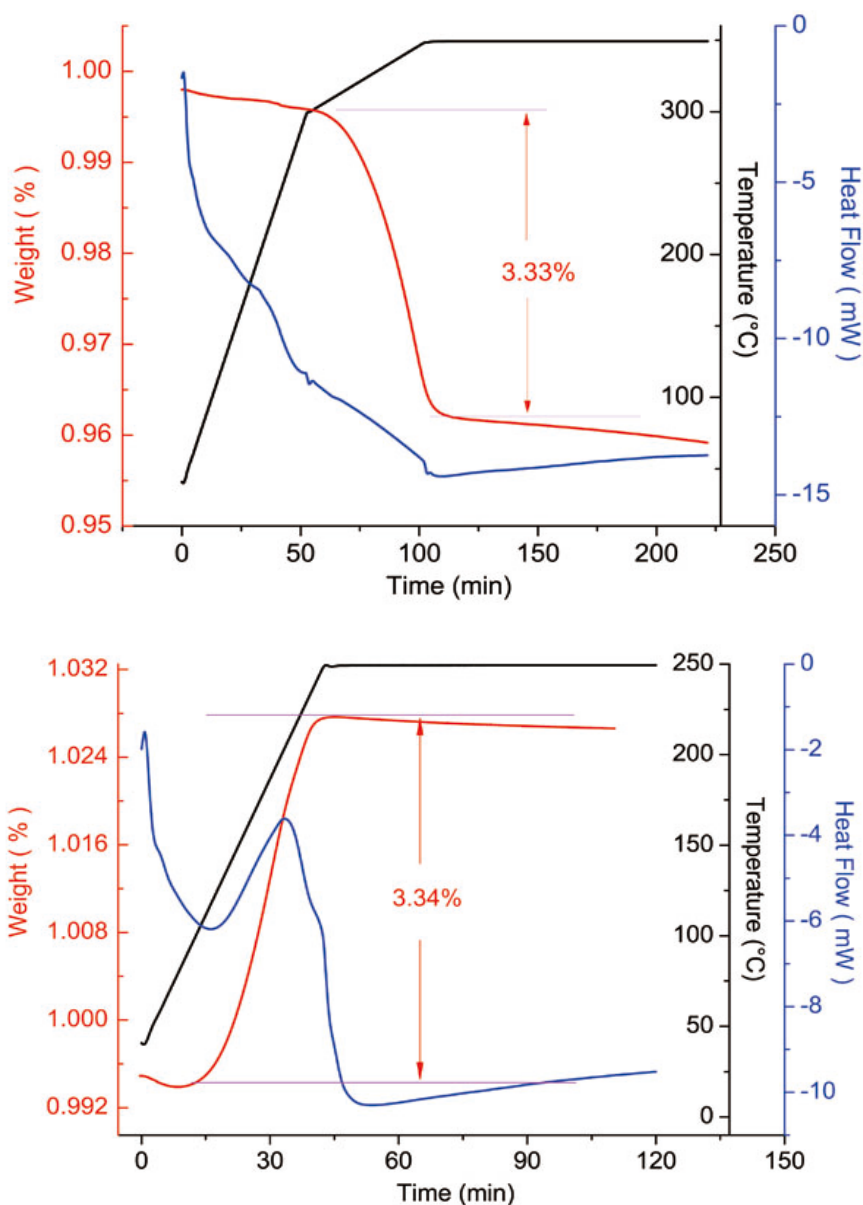

**Figure S5** TG-DSC analyses as a function of time for reduction syntheses of Fe<sub>3</sub>O<sub>4</sub> hollow nanospheres (up, heating rate: ramp 5 °C/min to 300 °C, then 1 °C/min to 350 °C and isotherm at 350 °C for 1h) and oxidation syntheses of γ-Fe<sub>2</sub>O<sub>3</sub> hollow nanospheres (down, heating rate: ramp 5 °C/min to 250 °C and isotherm at 250 °C for 2h). Curves in red: percent of weight loss or gain; curves in blue: heat flow; curves in black: temperature. The results show theoretical percent weight lost or gained in the syntheses.

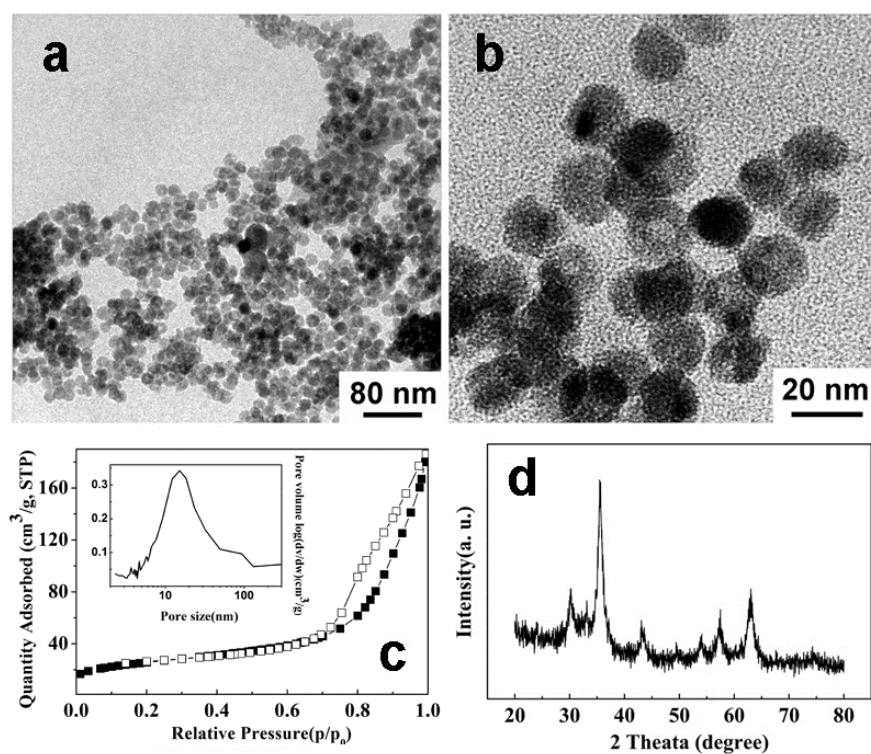

**Figure S6** Structural characterization of  $\text{Fe}_3\text{O}_4$  hollow nanospheres: (a, b) TEM images, (c) Nitrogen physisorption and pore size distributions, (d) XRD pattern.

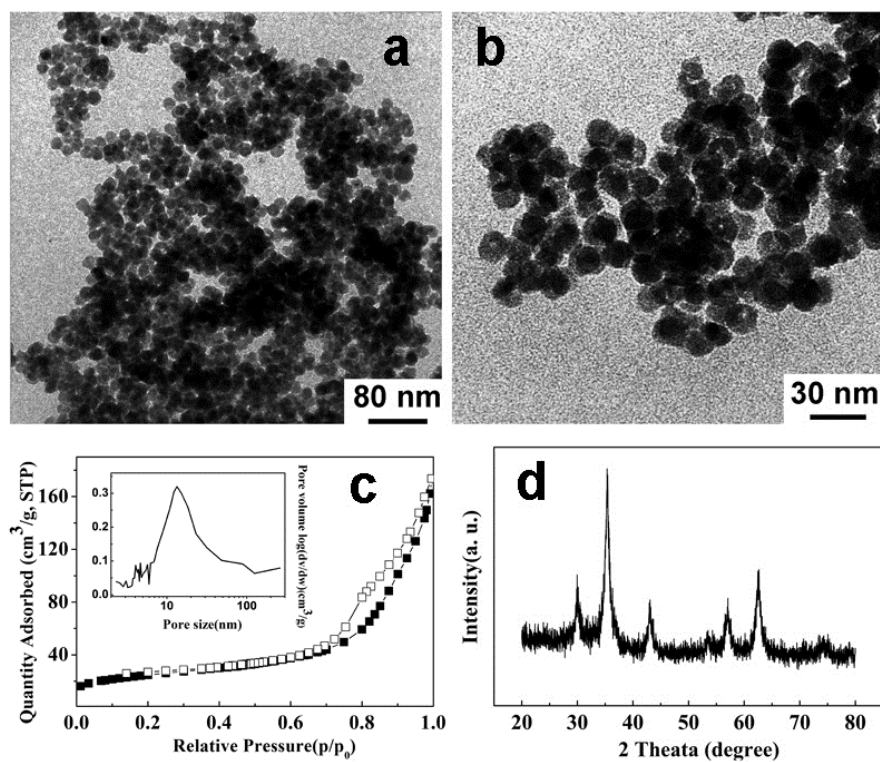

**Figure S7** Structural characterization of  $\gamma\text{-Fe}_2\text{O}_3$  hollow nanospheres: (a, b) TEM images, (c) Nitrogen physisorption and pore size distributions, (d) XRD pattern.
